# Supplementary material
Source: PubMed Central journal article supplement (PMC4002329)
Supplement: cmi201223x1.pdf [file cmi201223x1.pdf]

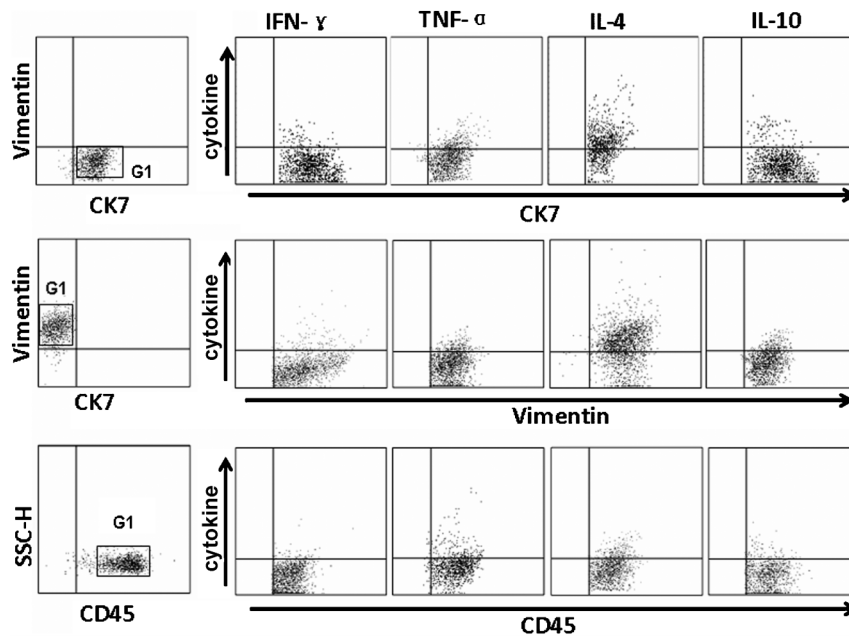

**Supplemental Figure 1** Flow cytometry analyzed the expression of cytokines in the components at the maternal/fetal interface. The isolated human trophoblasts, DSCs and DICs were treated with PMA, ionomycin and brefedlin A for 4 h, and then labeled for surface expression of CD45 and for intracellular expression of CK-7, vimentin, TNF- $\alpha$ , IFN- $\gamma$ , IL-4 and IL-10. The intracellular production of cytokines was analyzed by flow cytometry. The representative flow cytometric pictures are presented. CK, cytokeratin; DIC, decidual immune cell; DSC, decidual stromal cell; IFN, interferon; PMA, phorbol myristate acetate; TNF, tumor-necrosis factor.

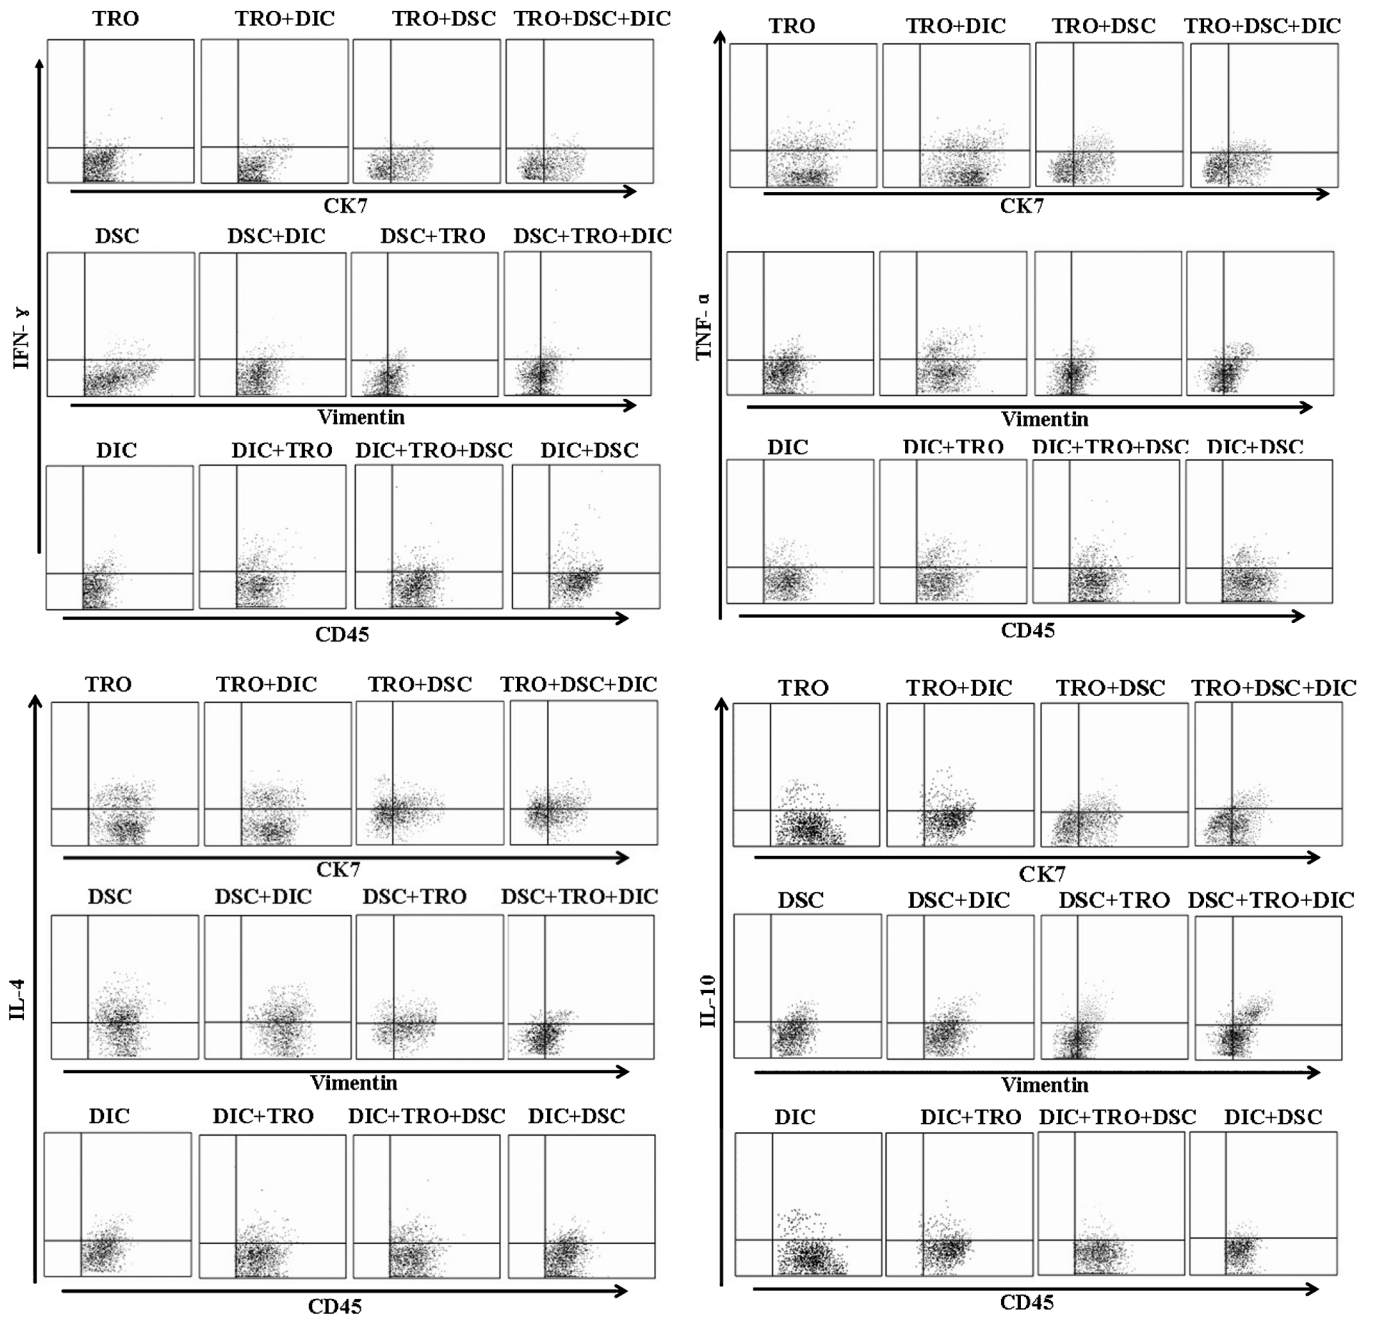

**Supplemental Figure 2** The Th1- and Th2-type cytokine production in the coculture of the components at maternal/fetal interface. Flow cytometry for the intracellular cytokine production in primary trophoblasts, DSCs and DICs. The isolated human trophoblasts, DSCs and DICs were seeded in six-well plates, respectively, for 48 h. Before harvest, the cells were treated by PMA, ionomycin and brefedlin A for 4 h. The cells were labeled for surface expression of CD45 and for intracellular CK-7, vimentin, IFN- $\gamma$  (a), TNF- $\alpha$  (b), IL-4 (c) and IL-10 (d). The intracellular production of cytokines was analyzed by flow cytometry. The representative flow cytometric pictures are presented. CK, cytokeratin; DIC, decidual immune cell; DSC, decidual stromal cell; IFN, interferon; PMA, phorbol myristate acetate; TNF, tumor-necrosis factor.
